# Supplementary material
Source: Springer Nature journal article supplement (https://www.springermedizin.de/resource/supplementary/12879_2011_1618_MOESM2_ESM.pdf/9442940)

x 10<sup>6</sup> cells/l

White  
Blood  
Cells in  
CSF

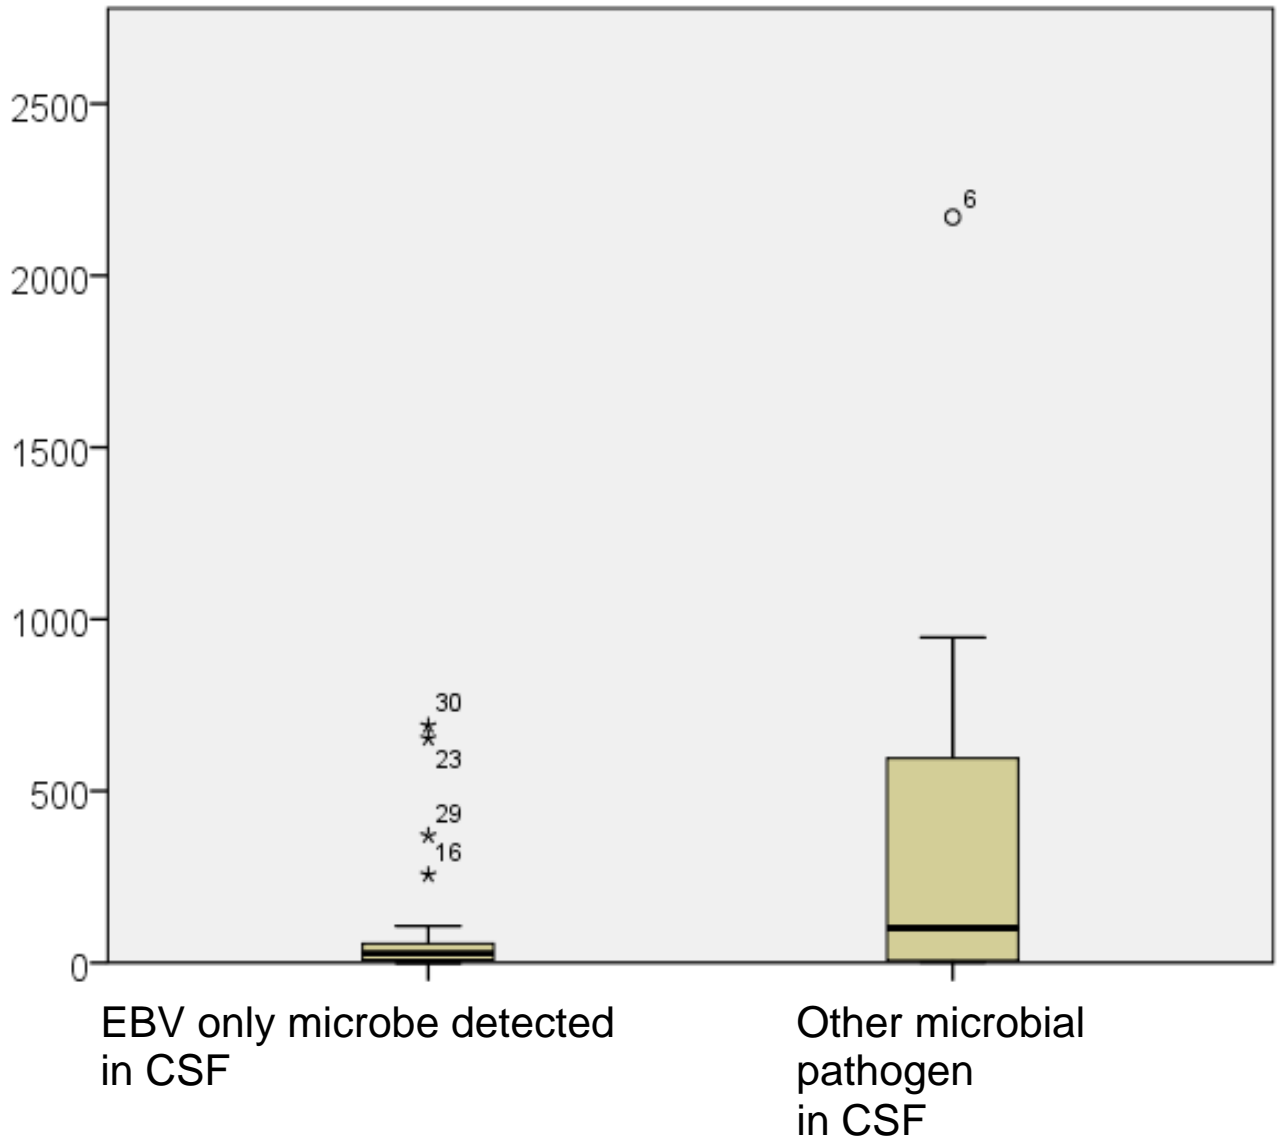

Supplement: MOESM2 [file 9442940]
